# Supplementary material
Source: Copernicus journal article supplement (doi:10.5194/nhess-26-2065-2026)

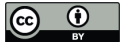

*Supplement of*

## **Longitudinal wave power as a proxy for coastal change detection**

**Marta Aragón et al.**

*Correspondence to:* Marta Aragón (maragon@ugr.es)

The copyright of individual parts of the supplement might differ from the article licence.

## Information related to the Van Rijn formulation

Table S1. Parameters used for the sediment formulation. [-] indicated non-dimensional and [log] indicated a logical value.

| Parameter     | Value    | Definition                                                            |
|---------------|----------|-----------------------------------------------------------------------|
| <b>IopSus</b> | 0 [log]  | Suspended particle diameter determination                             |
| <b>Pangle</b> | 51 [deg] | Phase lead for bed shear stress                                       |
| <b>Fpco</b>   | 1 [-]    | Phase lag effect in wave-induced suspended transport                  |
| <b>Subiw</b>  | 51 [-]   | Wave period subdivision                                               |
| <b>EpsPar</b> | 0 [log]  | Van Rijn's parabolic mixing coefficient                               |
| <b>GamTcr</b> | 1.5 [-]  | Power of the grain size ratio in the critical shear stress expression |
| <b>SalMax</b> | 0 [-]    | Salinity for saline settling velocity                                 |
| <b>BetaM</b>  | 0 [-]    | Exponent used for effect of mud fraction on critical shear stress     |
| <b>Wform</b>  | 1 [log]  | Wave form used                                                        |

## Model set-up.

**Table S2. Overview of the Delft3D and SWAN model parameters.**

| Parameter      | Value       | Units                            | Description                                              |
|----------------|-------------|----------------------------------|----------------------------------------------------------|
| <b>General</b> |             |                                  |                                                          |
| Tstart         | 0           | min                              | Start time                                               |
| Tstop          | 525600      | min                              | Stop time                                                |
| Dt             | 0.1         | min                              | Timestep                                                 |
| Ag             | 9.81        | ms <sup>-2</sup>                 | Gravitational Acceleration                               |
| <b>Flow</b>    |             |                                  |                                                          |
| Rhow           | 1000        | kgm <sup>-3</sup>                | Water Density                                            |
| Tempw          | 15          | C                                | Water Temperature                                        |
| Salw           | 31          | ppt                              | Salinity                                                 |
| Rouwav         | FR84        |                                  | Bottom Stress formulation due to wave action             |
| Rhoa           | 1           | kgm <sup>-3</sup>                | Air Density                                              |
| Ccofu          | 65          | m <sup>0.5</sup> s <sup>-1</sup> | Chezy roughness u                                        |
| Ccofv          | 65          | m <sup>0.5</sup> s <sup>-1</sup> | Chezy roughness v                                        |
| Vicouv         | 2           |                                  | Uniform horizontal eddy viscosity                        |
| Dicouv         | 10          |                                  | Uniform vertical eddy diffusivity                        |
| Irov           | 0           |                                  | Wall roughness (slip condition)                          |
| Dryflc         | 0.05        | m                                | Threshold depth for drying and flooding                  |
| Tlfsmo         | 60          | s                                | Time interval to smooth hydrodynamic boundary conditions |
| North          | Neumann     |                                  | North boundary condition                                 |
| RettisNorth    | 0           | min                              | North Thatcher Harlemann return time                     |
| East           | water level | m                                | East boundary condition                                  |
| South          | Neumann     |                                  | South boundary condition                                 |
| RettisEast     | 0           | min                              | South Thatcher Harlemann return time                     |
| River          | discharge   | m <sup>3</sup> /s                | River boundary condition                                 |
| RettisRiver    | 0           | min                              | River Thatcher Harlemann return time                     |
| <b>Waves</b>   |             |                                  |                                                          |
| MinimumDepth   | 0.05        | m                                | Minimum depth                                            |
| GenModePhysics | 3           |                                  | Generation mode of physics                               |
| Breaking       | true        |                                  | Include wave breaking                                    |
| BreakAlpha     | 1           |                                  | Alpha coefficient for wave breaking                      |
| BreakGamma     | 0.73        |                                  | Gamma coefficient for wave breaking                      |
| BedFriction    | jonswap     |                                  | Bed friction type                                        |
| BedFricCoef    | 0.067       |                                  | Bed friction coefficient                                 |
| Diffraction    | false       |                                  | Include diffraction                                      |

| Parameter         | Value            | Units           | Description                                                        |
|-------------------|------------------|-----------------|--------------------------------------------------------------------|
| WindGrowth        | false            |                 | Include wind growth                                                |
| WhiteCapping      | Komen            |                 | White capping formulation                                          |
| Quadruplts        | false            |                 | Include quadruplets                                                |
| Refraction        | true             |                 | Include refraction                                                 |
| FreqShift         | true             |                 | Include frequency shifting in frequency space                      |
| WaveForces        | Dissipation 3d   |                 | Method of wave force computation                                   |
| FlowBedLevel 1    | 0                |                 | Use bed level from FLOW in WAVE domain but do not extend           |
| FlowWaterLevel 1  | 0                |                 | Use water level from FLOW and extend across WAVE domain            |
| FlowVelocity 1    | 0                |                 | Use water level from FLOW and extend across WAVE domain            |
| FlowBedLevel 2    | use / extend (2) |                 | Use bed level from FLOW and extend across WAVE domain              |
| FlowWaterLevel 2  | use / extend (2) |                 | Use water level from FLOW and extend across WAVE domain            |
| FlowVelocity 2    | use / extend (2) |                 | Use flow velocity from FLOW and extend across WAVE domain          |
| DirSpace          | circle           |                 | Default directional space                                          |
| Ndir              | 36               |                 | Number of directional bins                                         |
| FreqMin           | 0.05             | s <sup>-1</sup> | Minimum frequency                                                  |
| FreqMax           | 1                | s <sup>-1</sup> | Maximum frequency                                                  |
| Nfreq             | 24               |                 | Number of frequencies                                              |
| SpectrumSpec      | parametric       |                 | Spectrum type                                                      |
| SpShapeType       | jonswap          |                 | Spectrum shape                                                     |
| PeriodType        | peak             |                 | Wave period type                                                   |
| DirSpreadType     | power            |                 | Directional spreading type                                         |
| PeakEnhanceFac    | 3.3              |                 | Peak enhancement factor                                            |
| WaveHeight        | var              | m               | Wave height at boundaries                                          |
| PeriodType        | var              | s               | Wave period at boundaries                                          |
| Direction         | var              | deg             | Wave direction at boundaries                                       |
| DirSpreading      | 4                | deg             | Directional spreading                                              |
| <b>Morphology</b> |                  |                 |                                                                    |
| EpsPar            | false            |                 | Vertical mixing distribution according to van Rijn                 |
| MorFac            | 1                |                 | Morphological scale factor                                         |
| MorStt            | 720              | min             | Spin-up interval from TStart to the start of morphological changes |
| Thresh            | 0.05             | m               | Threshold sediment thickness for transport and erosion reduction   |
| MorUpd            | true             |                 | Update bathymetry during FLOW simulation                           |
| EqmBc             | true             |                 | Equilibrium sand concentration profile at inflow boundaries        |
| DensIn            | false            |                 | Include effect of sediment concentration on fluid density          |

| Parameter | Value | Units | Description                                                     |
|-----------|-------|-------|-----------------------------------------------------------------|
| AksFac    | 1     |       | van Rijn's reference height                                     |
| Rwave     | 2     |       | Wave related roughness. Van Rijn recommends range 1-3           |
| AlfaBs    | 1     |       | Streamwise bed gradient factor for bed load transport           |
| AlfaBn    | 1.5   |       | Transverse bed gradient factor for bed load transport           |
| Sus       | 1     |       | Multiplication factor for suspended sediment ref. concentration |
| Bed       | 1     |       | Multiplication factor for bed-load transport vector magnitude   |
| SusW      | 0.15  |       | Wave-related suspended sed. transport factor                    |
| BedW      | 0.15  |       | Wave-related bed-load sed. transport factor                     |
| SedThr    | 0.1   | m     | Minimum water depth for sediment computations                   |
| ThetSD    | 1     |       | Factor for erosion of adjacent dry cells                        |
| HMaxTH    | 1.5   | m     | Max depth for variable THETSD.                                  |
| FWFac     | 1     |       | Tuning parameter for wave streaming                             |

#### Sediment

|             |       |                   |                                                                       |
|-------------|-------|-------------------|-----------------------------------------------------------------------|
| Cref        | 1600  | kgm <sup>-3</sup> | CSoil Reference density for hindered settling calculations            |
| RhoSol      | 2650  | kg/m <sup>3</sup> | Specific density                                                      |
| SedDia      | 0.001 | m                 | Median sediment diameter (D50)                                        |
| CdryB       | 1600  | kg/m <sup>3</sup> | Dry bed density                                                       |
| IniSedThick | 10    | m                 | Initial sediment sand layer thickness at bed, updrift sediments       |
| FacDSS      | 1     |                   | FacDss * SedDia = Initial suspended sediment diameter.                |
| IopSus      | false |                   | Suspended particle diameter determination                             |
| Pangle      | 51    | deg               | Phase lead for bed shear stress                                       |
| Fpco        | 1     |                   | Phase lag effect in wave-induced suspended transport                  |
| Subiw       | 51    |                   | Wave period subdivision                                               |
| EpsPar      | false |                   | Van Rijn's parabolic mixing coefficient                               |
| GamTcr      | 1.5   |                   | Power of the grain size ratio in the critical shear stress expression |
| SalMax      | 0     |                   | Salinity for saline settling velocity                                 |
| BetaM       | 0     |                   | Exponent used for effect of mud fraction on critical shear stress     |
| Wform       | true  |                   | Wave form used                                                        |

POT combinations.

Table S3. POT combinations for the morphological and climatic events

| Combination number | Percentile | Independence criterion (days) | Minimum event duration (hours) |
|--------------------|------------|-------------------------------|--------------------------------|
| 1                  | 95         | 2                             | 6                              |
| 2                  | 95         | 2                             | 12                             |
| 3                  | 95         | 2                             | 18                             |
| 4                  | 95         | 2                             | 24                             |
| 5                  | 95         | 2                             | 48                             |
| 6                  | 95         | 3                             | 6                              |
| 7 (T-POT)          | 95         | 3                             | 12                             |
| 8                  | 95         | 3                             | 18                             |
| 9                  | 95         | 3                             | 24                             |
| 10                 | 95         | 3                             | 48                             |
| 11                 | 95         | 4                             | 6                              |
| 12                 | 95         | 4                             | 12                             |
| 13                 | 95         | 4                             | 18                             |
| 14                 | 95         | 4                             | 24                             |
| 15                 | 95         | 4                             | 48                             |
| 16                 | 96         | 2                             | 6                              |
| 17                 | 96         | 2                             | 12                             |
| 18                 | 96         | 2                             | 18                             |
| 19                 | 96         | 2                             | 24                             |
| 20                 | 96         | 2                             | 48                             |
| 21                 | 96         | 3                             | 6                              |
| 22                 | 96         | 3                             | 12                             |
| 23                 | 96         | 3                             | 18                             |
| 24                 | 96         | 3                             | 24                             |
| 25                 | 96         | 3                             | 48                             |

| Combination number | Percentile | Independence criterion (days) | Minimum event duration (hours) |
|--------------------|------------|-------------------------------|--------------------------------|
| 26                 | 96         | 4                             | 6                              |
| 27                 | 96         | 4                             | 12                             |
| 28                 | 96         | 4                             | 18                             |
| 29                 | 96         | 4                             | 24                             |
| 30                 | 96         | 4                             | 48                             |
| 31                 | 98         | 2                             | 6                              |
| 32                 | 98         | 2                             | 12                             |
| 33                 | 98         | 2                             | 18                             |
| 34                 | 98         | 2                             | 24                             |
| 35                 | 98         | 2                             | 48                             |
| 36                 | 98         | 3                             | 6                              |
| 37                 | 98         | 3                             | 12                             |
| 38                 | 98         | 3                             | 18                             |
| 39                 | 98         | 3                             | 24                             |
| 40                 | 98         | 3                             | 48                             |
| 41                 | 98         | 4                             | 6                              |
| 42                 | 98         | 4                             | 12                             |
| 43                 | 98         | 4                             | 18                             |
| 44                 | 98         | 4                             | 24                             |
| 45                 | 98         | 4                             | 48                             |

Sensitivity analysis

Table S4. Match results obtained for the T-POT (POT(95,3,12)) and the Optimal POT(POT(95,4,6)) combination, including the original simulation and sensitivity analyses of uniform horizontal eddy viscosity ( $\epsilon$ ) and Chèzy roughness coefficients.

|           |                                |                 | LWP-ME90     |              | Hs-ME90      |              | LWP-ME95     |              | Hs-ME95      |              |
|-----------|--------------------------------|-----------------|--------------|--------------|--------------|--------------|--------------|--------------|--------------|--------------|
|           |                                |                 | NCV          | SCV          | NCV          | SCV          | NCV          | SCV          | NCV          | SCV          |
| 1980-1981 | <b>T-POT</b>                   | <b>Original</b> | <b>49.40</b> | <b>55.78</b> | <b>34.13</b> | <b>32.01</b> | <b>65.47</b> | <b>82.49</b> | <b>53.39</b> | <b>55.58</b> |
|           |                                | $\epsilon=1$    | 49.40        | 55.78        | 34.13        | 32.01        | 65.47        | 82.49        | 53.39        | 55.58        |
|           |                                | $\epsilon=5$    | 49.40        | 55.78        | 34.13        | 32.01        | 65.47        | 82.49        | 53.39        | 55.58        |
|           |                                | Chèzy=60        | 49.40        | 55.78        | 34.13        | 32.01        | 65.47        | 82.49        | 53.39        | 55.58        |
|           |                                | Chèzy=70        | 49.40        | 55.78        | 34.13        | 32.01        | 65.47        | 82.49        | 53.39        | 55.58        |
|           | <b>Optimal POT combination</b> | <b>Original</b> | <b>53.20</b> | <b>55.78</b> | <b>37.05</b> | <b>35.53</b> | <b>72.88</b> | <b>82.49</b> | <b>53.39</b> | <b>62.58</b> |
|           |                                | $\epsilon=1$    | 53.20        | 55.78        | 37.05        | 35.53        | 72.88        | 82.49        | 53.39        | 62.58        |
|           |                                | $\epsilon=5$    | 53.20        | 55.78        | 37.05        | 35.53        | 72.88        | 82.49        | 53.39        | 62.58        |
|           |                                | Chèzy=60        | 53.20        | 55.78        | 37.05        | 35.53        | 72.88        | 82.49        | 53.39        | 62.58        |
|           |                                | Chèzy=70        | 53.20        | 55.78        | 37.05        | 35.53        | 72.88        | 82.49        | 53.39        | 62.58        |
| 1999-2000 | <b>T-POT</b>                   | <b>Original</b> | <b>50.17</b> | <b>53.25</b> | <b>36.20</b> | <b>35.03</b> | <b>63.04</b> | <b>68.25</b> | <b>46.96</b> | <b>36.07</b> |
|           |                                | $\epsilon=1$    | 50.17        | 53.25        | 36.20        | 35.03        | 63.04        | 68.25        | 46.96        | 36.07        |
|           |                                | $\epsilon=5$    | 50.17        | 53.25        | 36.20        | 35.03        | 63.04        | 68.25        | 46.96        | 36.07        |
|           |                                | Chèzy=60        | 50.17        | 53.25        | 36.20        | 35.03        | 63.04        | 68.25        | 46.96        | 36.07        |
|           |                                | Chèzy=70        | 50.17        | 53.25        | 36.20        | 35.03        | 63.04        | 68.25        | 46.96        | 36.07        |
|           | <b>Optimal POT combination</b> | <b>Original</b> | <b>53.52</b> | <b>56.72</b> | <b>51.06</b> | <b>48.05</b> | <b>66.52</b> | <b>72.35</b> | <b>63.26</b> | <b>56.37</b> |
|           |                                | $\epsilon=1$    | 53.52        | 56.72        | 51.06        | 48.05        | 66.52        | 72.35        | 63.26        | 56.37        |
|           |                                | $\epsilon=5$    | 53.52        | 56.72        | 51.06        | 48.05        | 66.52        | 72.35        | 63.26        | 56.37        |
|           |                                | Chèzy=60        | 53.52        | 56.72        | 51.06        | 48.05        | 66.52        | 72.35        | 63.26        | 56.37        |
|           |                                | Chèzy=70        | 53.52        | 56.72        | 51.06        | 48.05        | 66.52        | 72.35        | 63.26        | 56.37        |

**LvC index**

**Table S5. LvC index calculated for each CV and for each experiment.**

| <b>Year (Experiment)</b> | <b>NCV</b> | <b>SCV</b> |
|--------------------------|------------|------------|
| <b>1980-1981 (1)</b>     | 0.25       | 0.30       |
| <b>1990-1991 (2)</b>     | 0.18       | 0.60       |
| <b>1999-2000 (3)</b>     | 0.85       | 0.66       |
| <b>2000-2001 (4)</b>     | 0.38       | 0.44       |
| <b>2010-2011 (5)</b>     | 0.01       | 0.40       |
| <b>2019-2020 (6)</b>     | 0.17       | 0.75       |

**Figure S1. Comparison between volume changes, in north (a) and south CV (b), LWP (c) and wave height (d) during the 1990-91 climate for ME90 (90<sup>th</sup> percentile for volume variation). In (c,d) the CE related to T-POT are marked in red dots.**

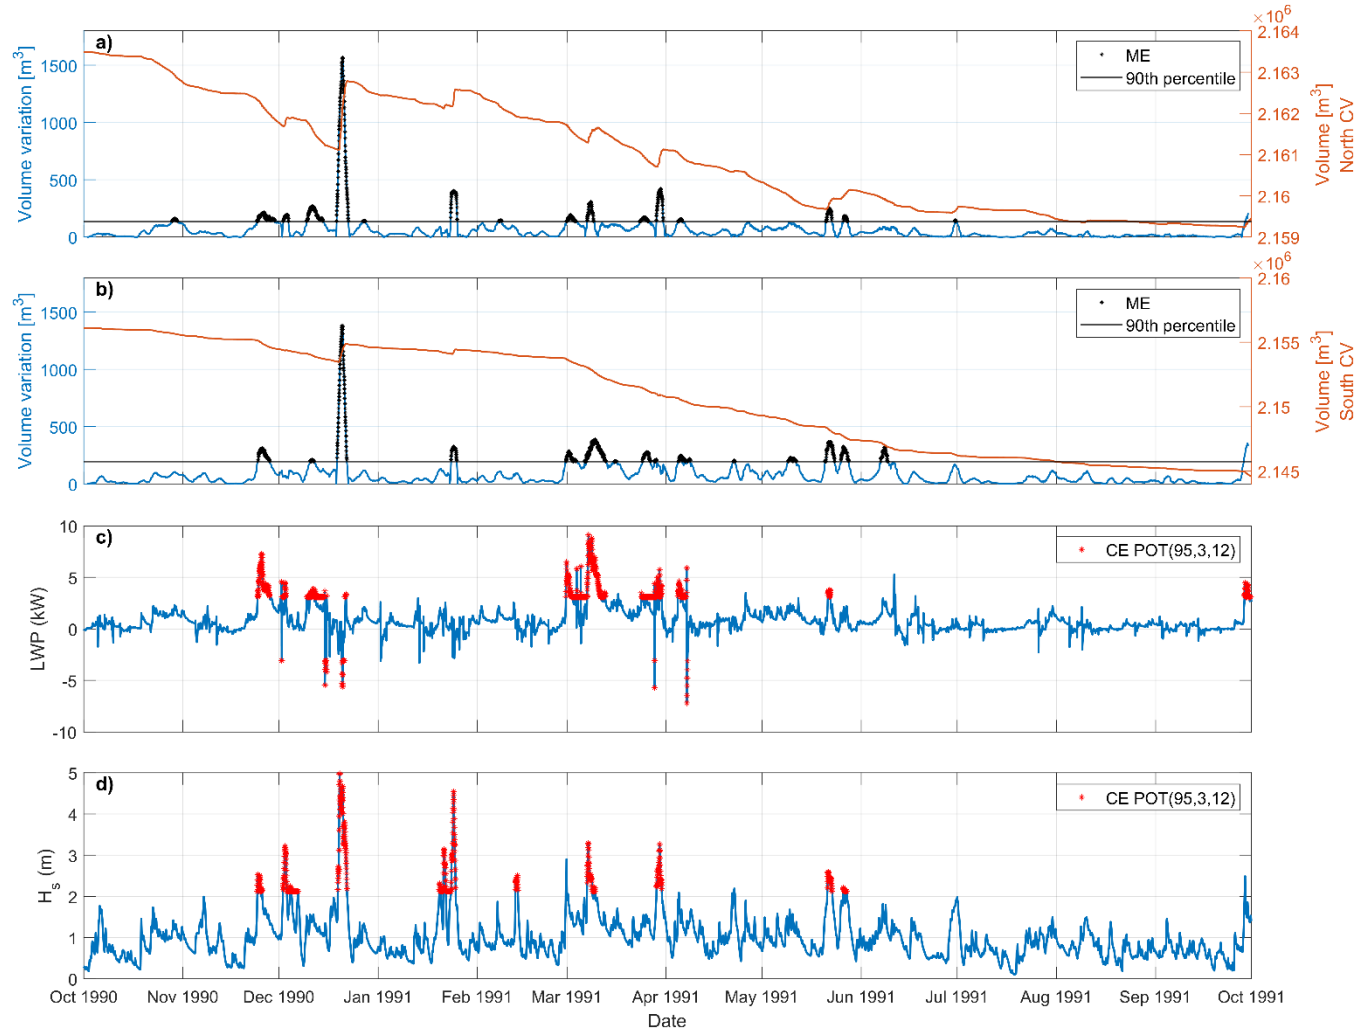

**Figure S2. Comparison between volume changes, in north (a) and south CV (b), LWP (c) and wave height (d) during the 1990-91 climate for ME95 (95<sup>th</sup> percentile for volume variation). In (c,d) the CE related to T-POT are marked in red dots.**

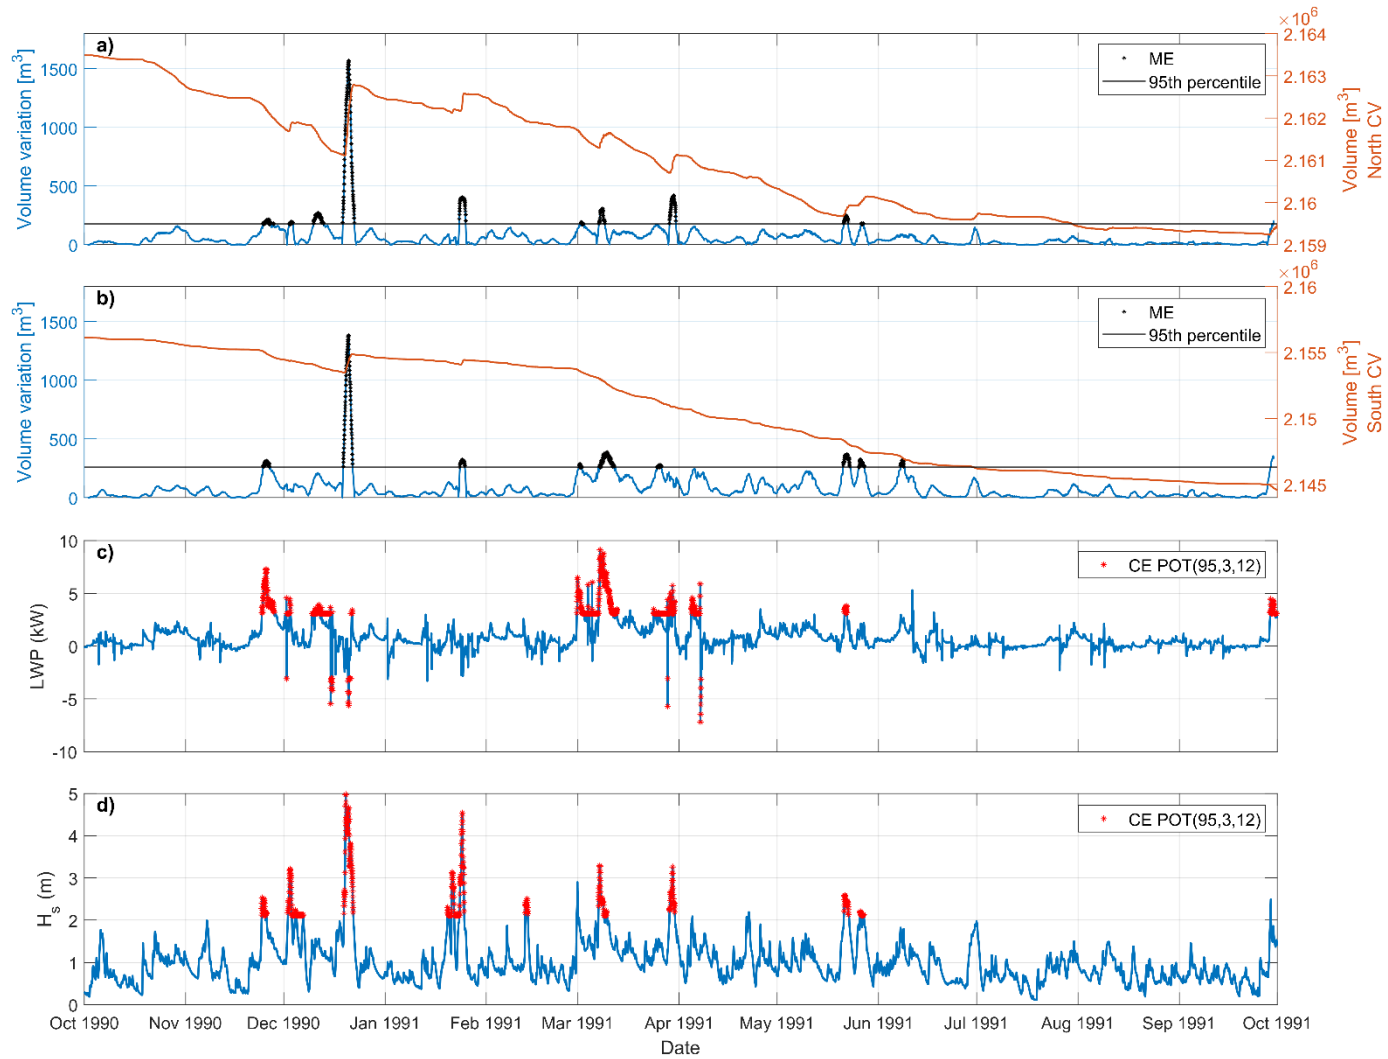

Figure S3. Comparison between volume changes, in north (a) and south CV (b), LWP (c) and wave height (d) during the 1999-2000 climate for ME90 (90<sup>th</sup> percentile for volume variation). In (c,d) the CE related to T-POT are marked in red dots.

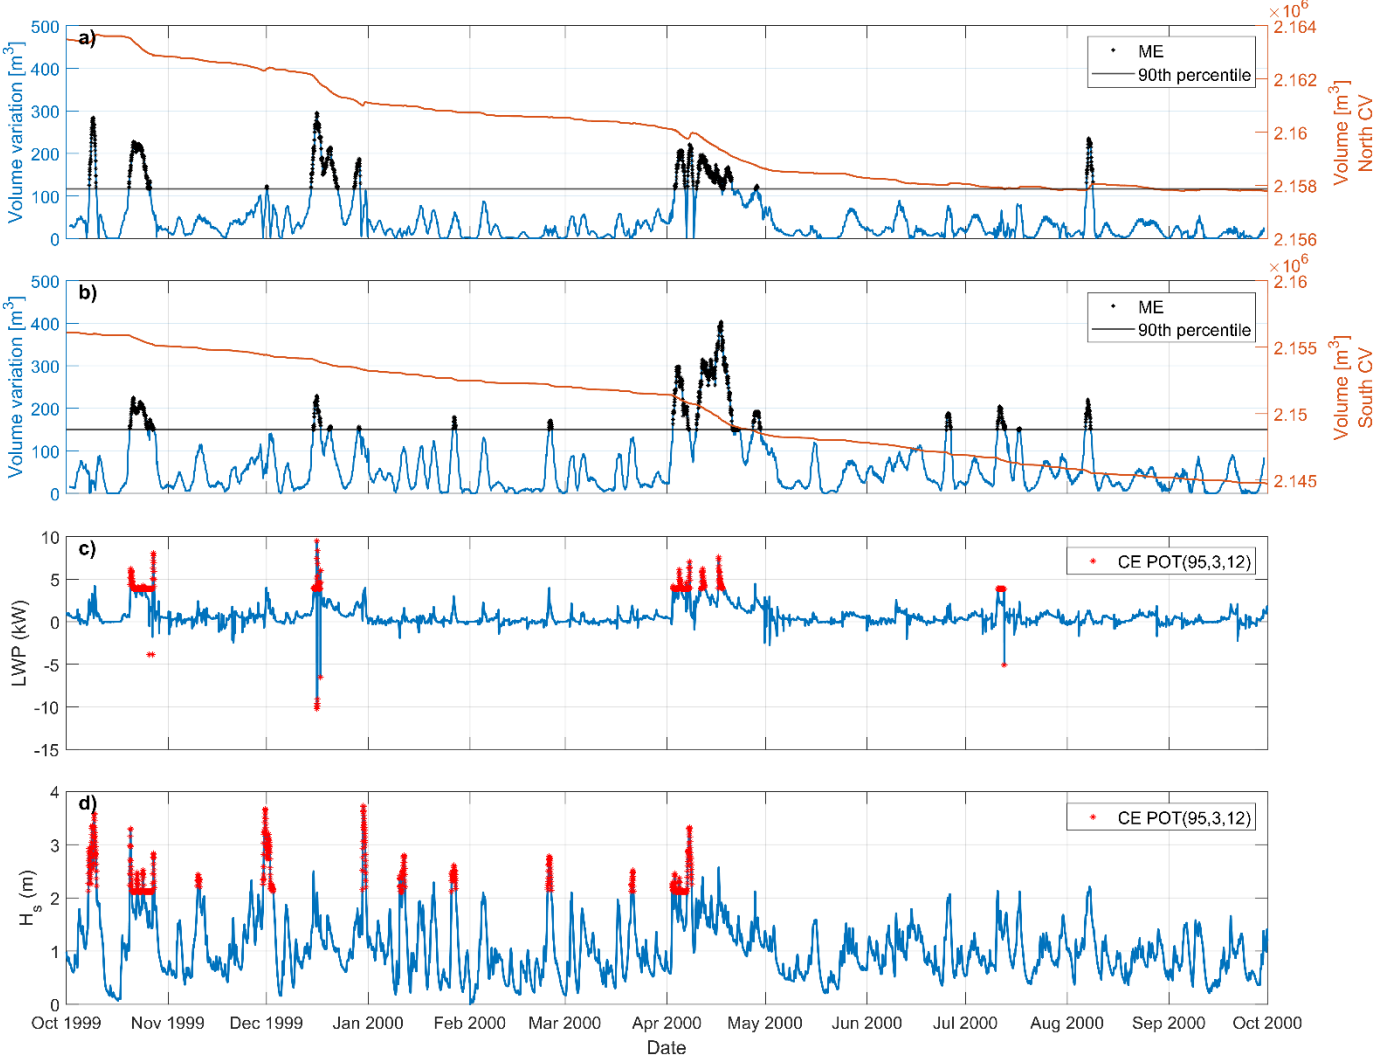

Figure S4. Comparison between volume changes, in north (a) and south CV (b), LWP (c) and wave height (d) during the 1999-2000 climate for ME95 (95<sup>th</sup> percentile for volume variation). In (c,d) the CE related to T-POT are marked in red dots.

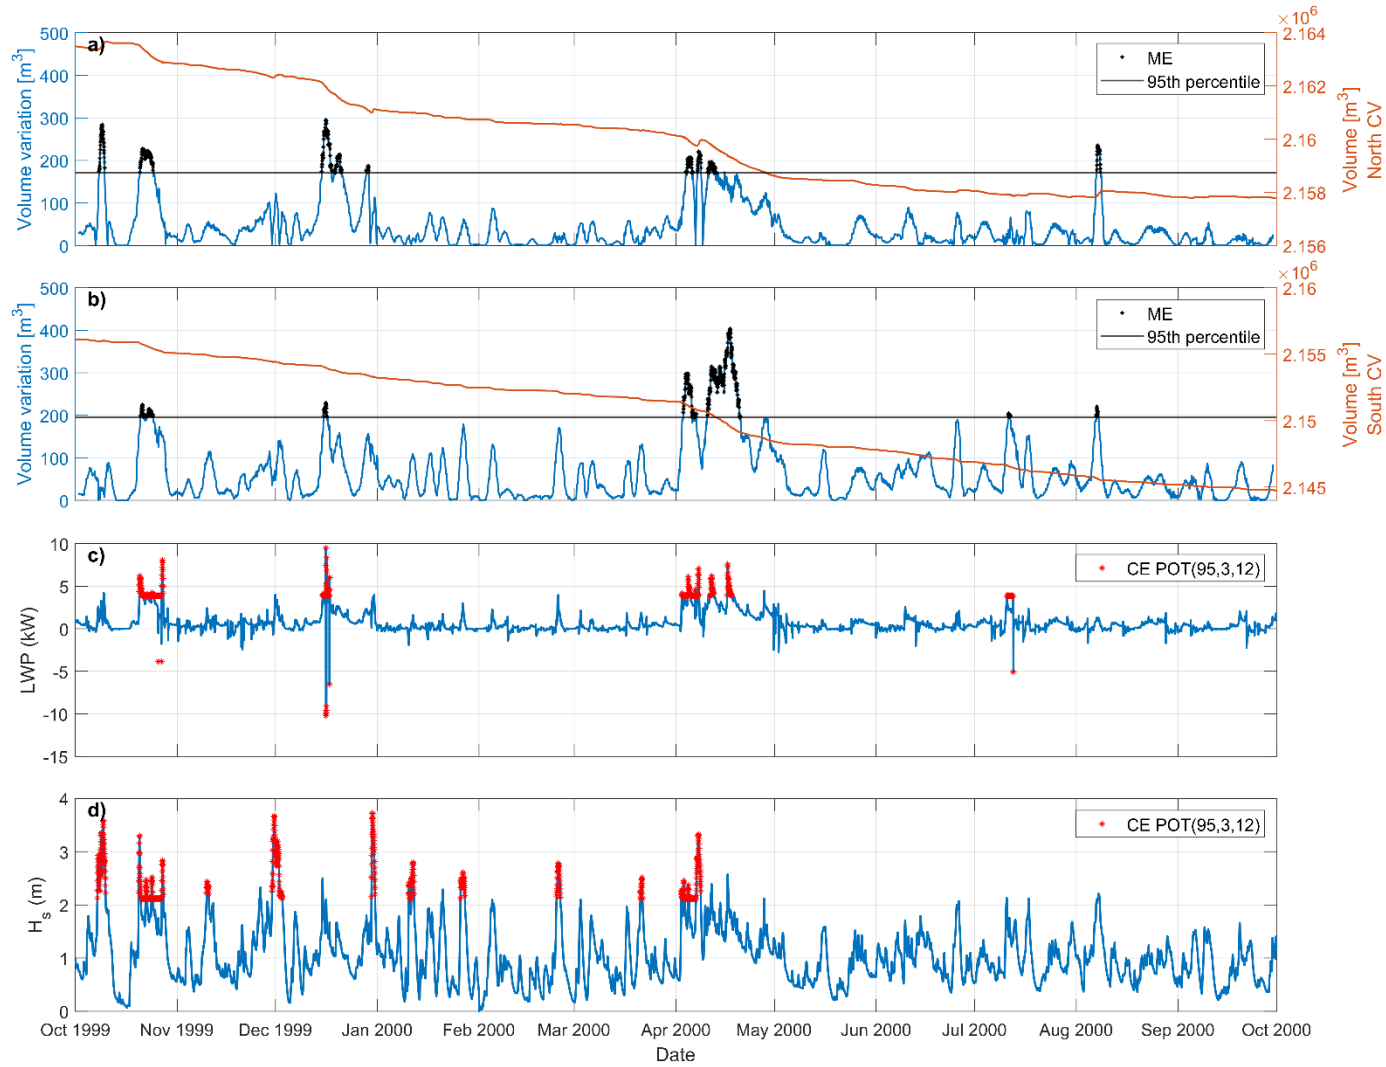

Figure S5. Comparison between volume changes, in north (a) and south CV (b), LWP (c) and wave height (d) during the 2000-2001 climate for ME90 (90<sup>th</sup> percentile for volume variation). In (c,d) the CE related to T-POT are marked in red dots.

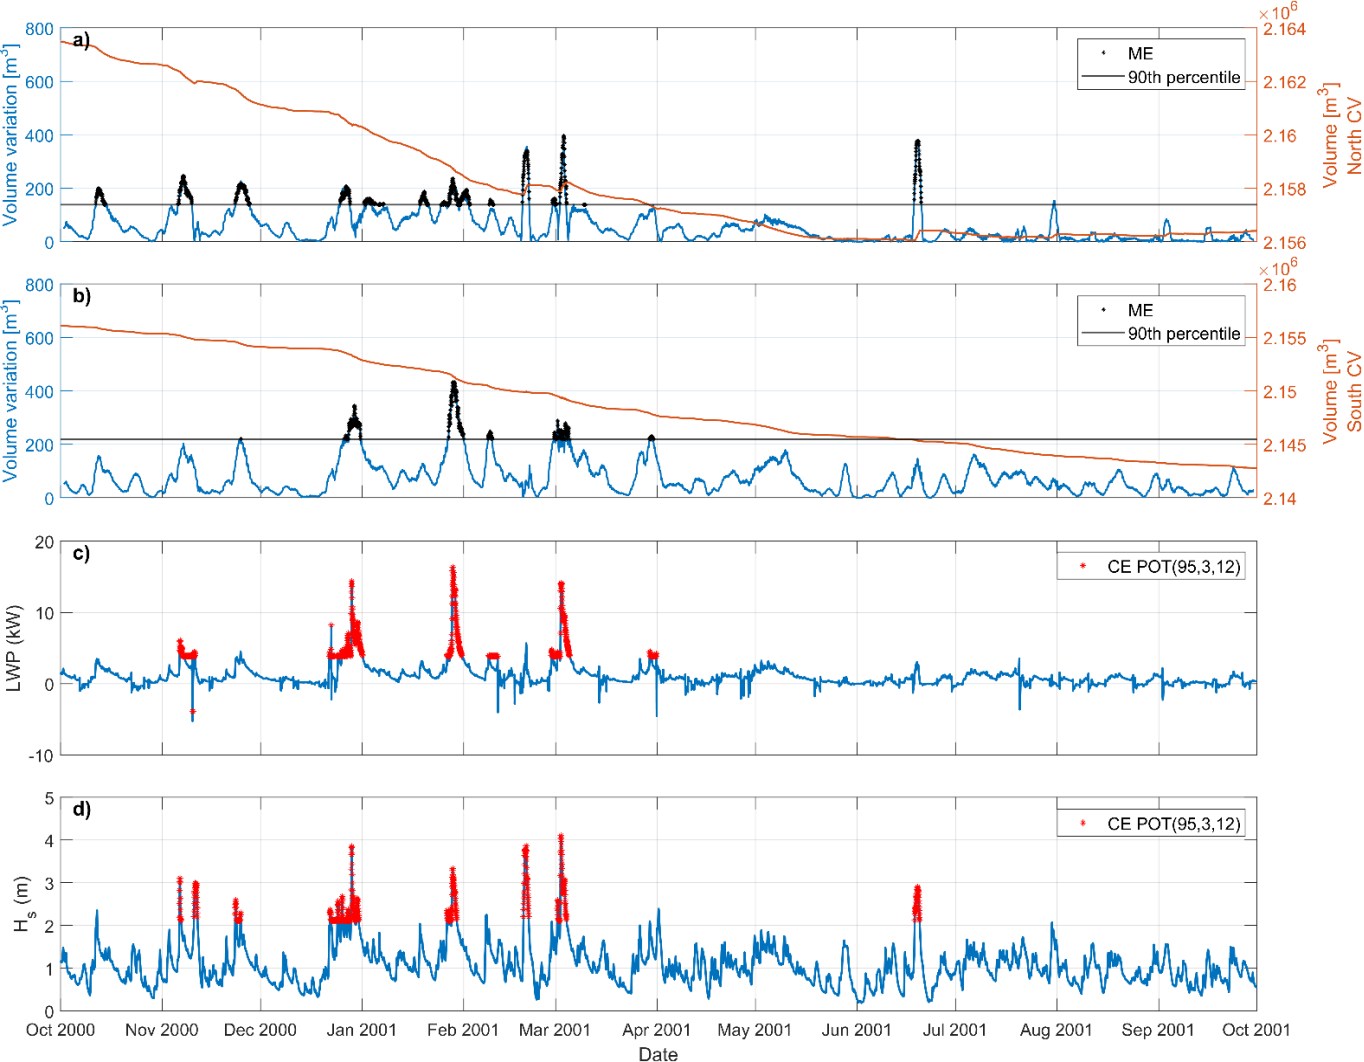

Figure S6. Comparison between volume changes, in north (a) and south CV (b), LWP (c) and wave height (d) during the 2000-2001 climate for ME95 (95<sup>th</sup> percentile for volume variation). In (c,d) the CE related to T-POT are marked in red dots.

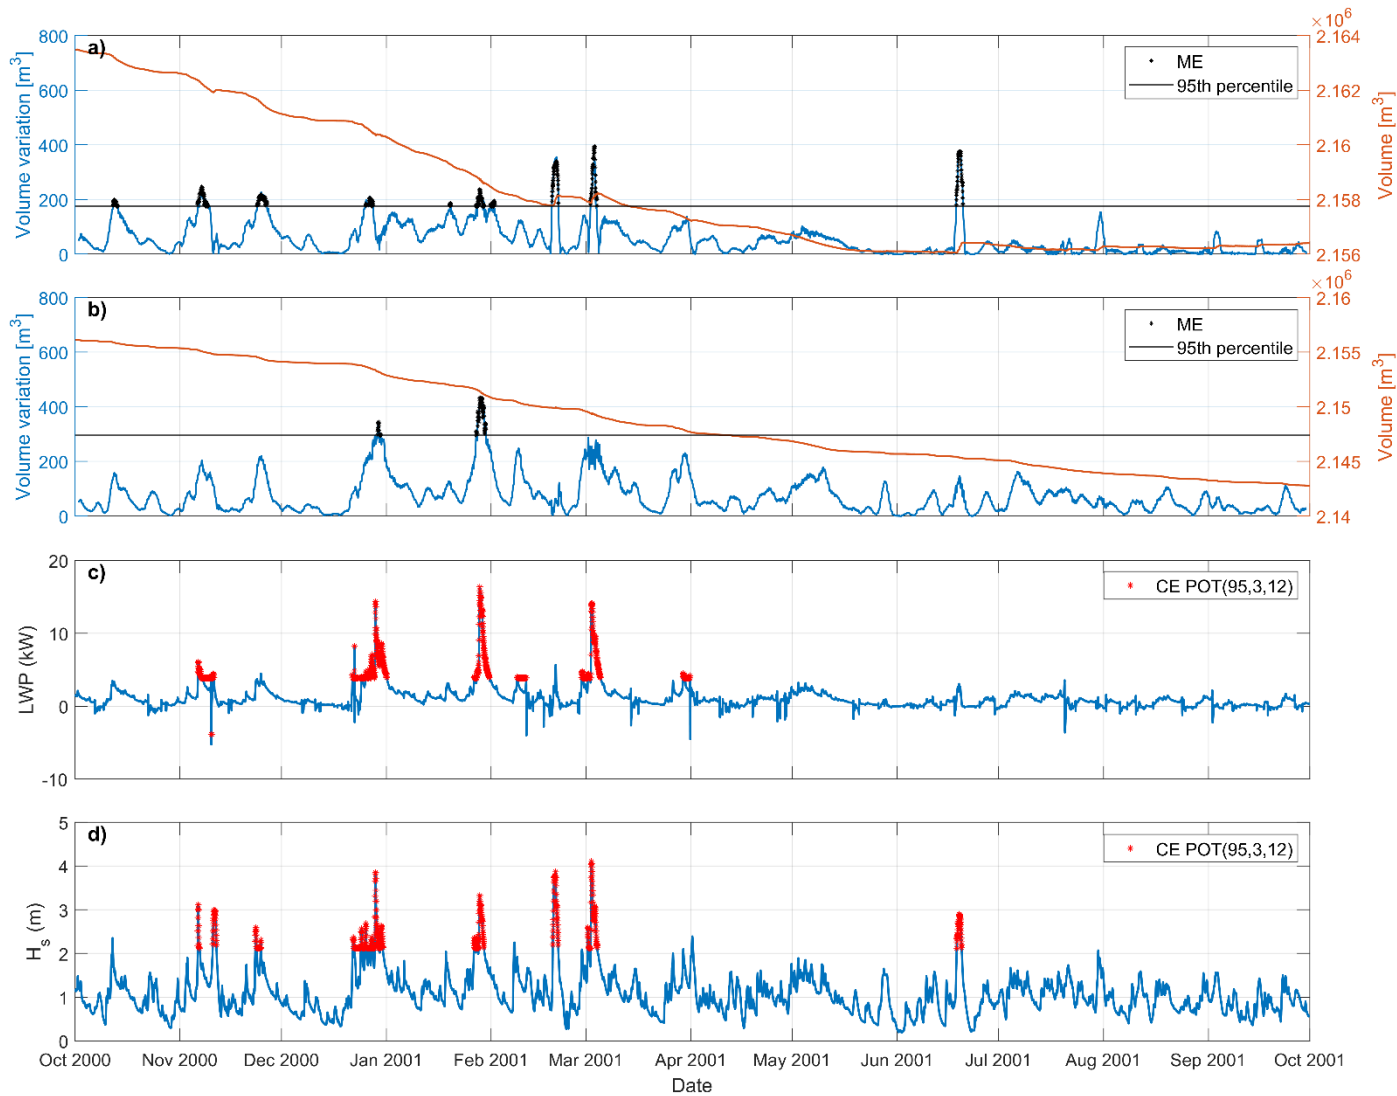

**Figure S7. Comparison between volume changes, in north (a) and south CV (b), LWP (c) and wave height (d) during the 2010-11 climate for ME90 (90<sup>th</sup> percentile for volume variation). In (c,d) the CE related to T-POT are marked in red dots.**

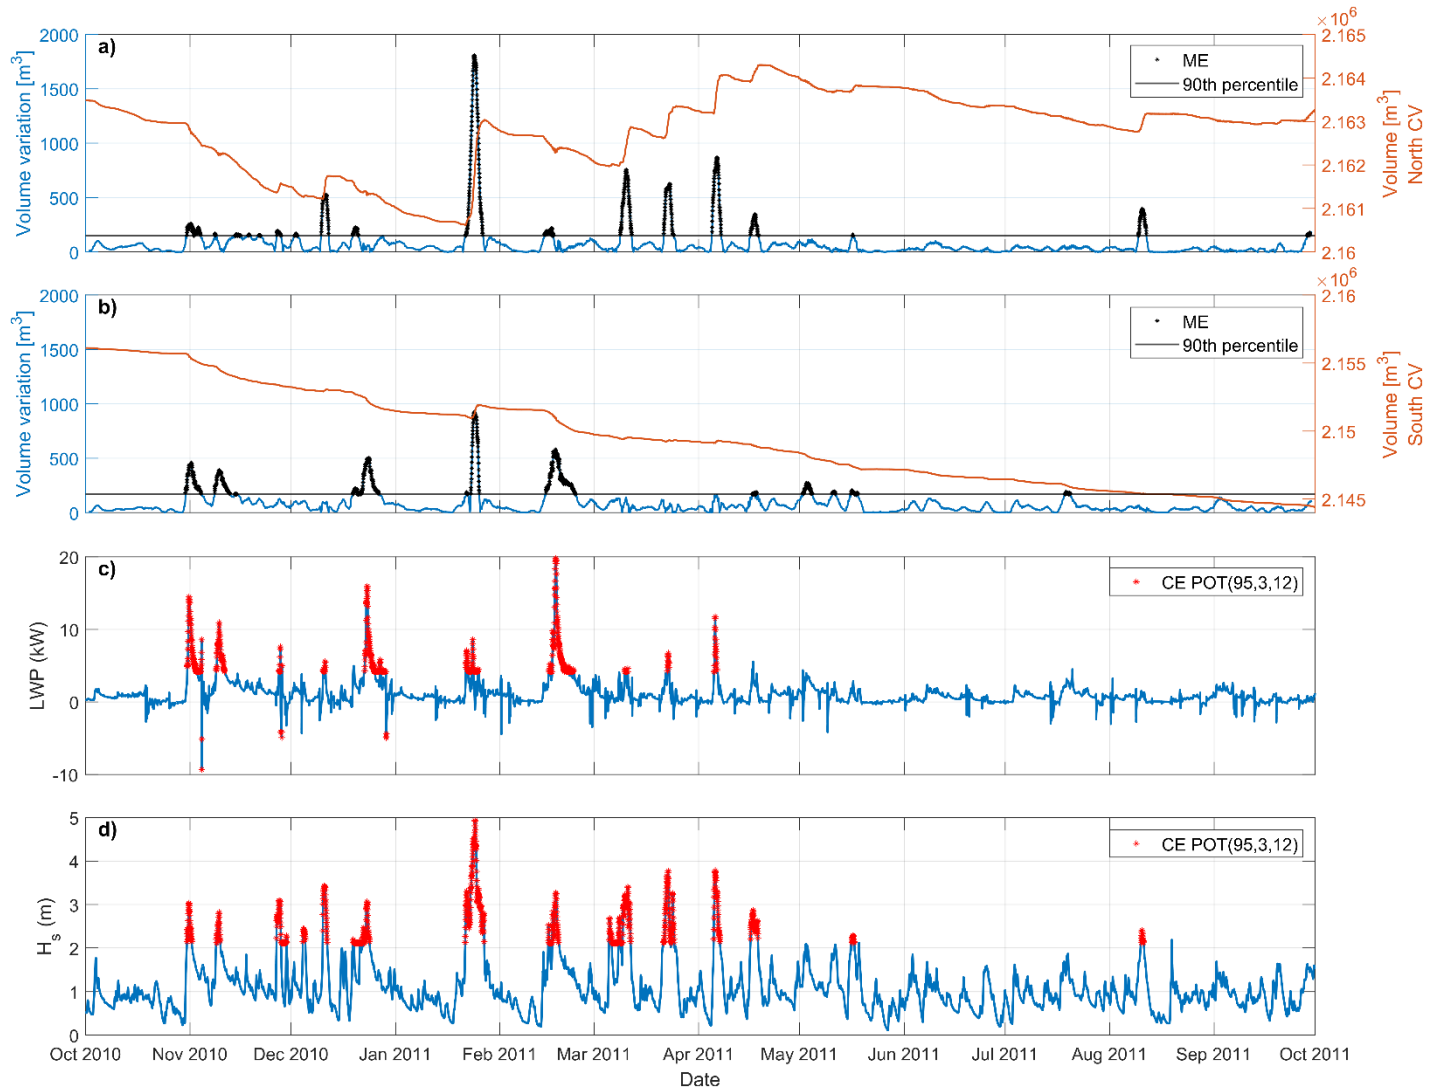

**Figure S8. Comparison between volume changes, in north (a) and south CV (b), LWP (c) and wave height (d) during the 2010-11 climate for ME95 (95<sup>th</sup> percentile for volume variation). In (c,d) the CE related to T-POT are marked in red dots.**

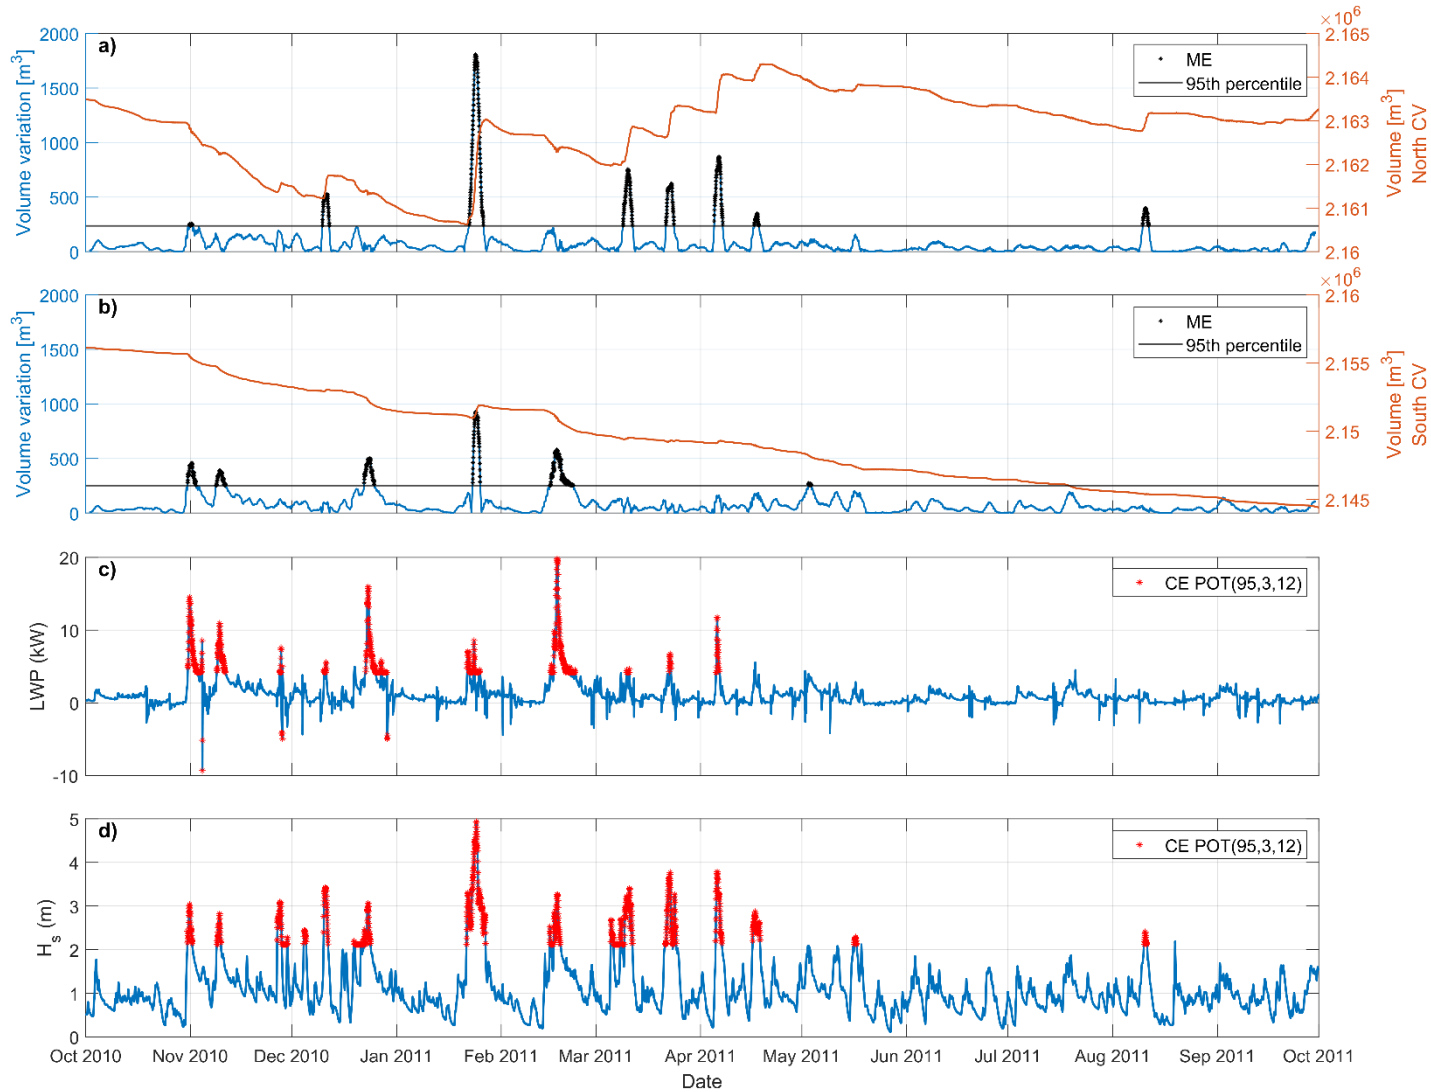

**Figure S9. Comparison between volume changes, in north (a) and south CV (b), LWP (c) and wave height (d) during the 2019-20 climate for ME90 (90<sup>th</sup> percentile for volume variation). In (c,d) the CE related to T-POT are marked in red dots.**

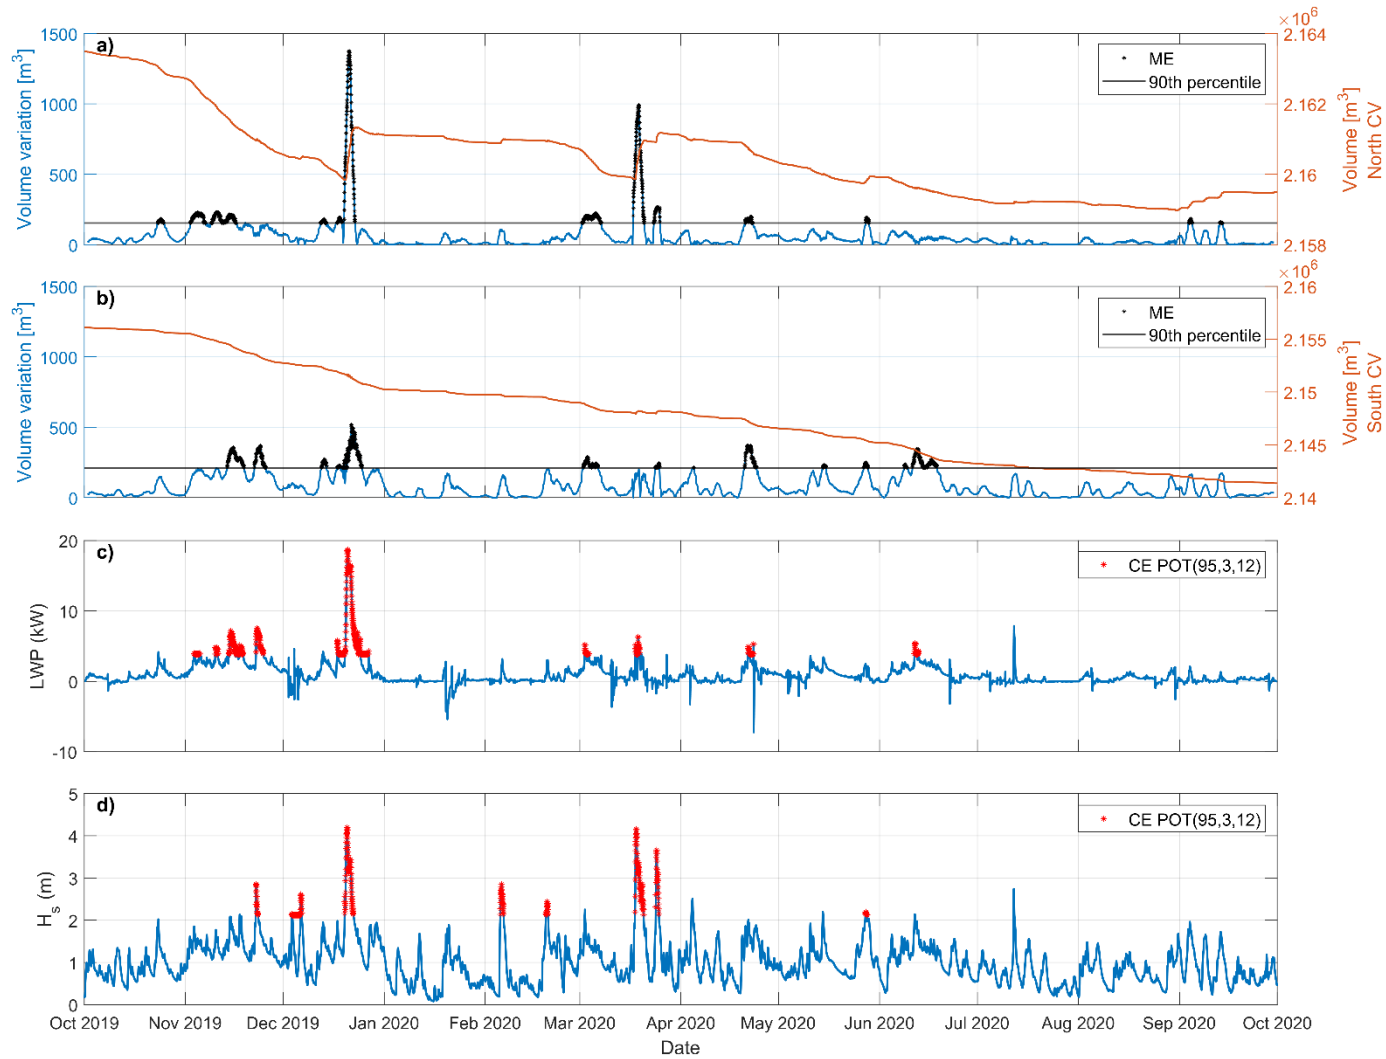

Figure S10. Comparison between volume changes, in north (a) and south CV (b), LWP (c) and wave height (d) during the 2019-20 climate for ME95 (95<sup>th</sup> percentile for volume variation). In (c,d) the CE related to T-POT are marked in red dots.

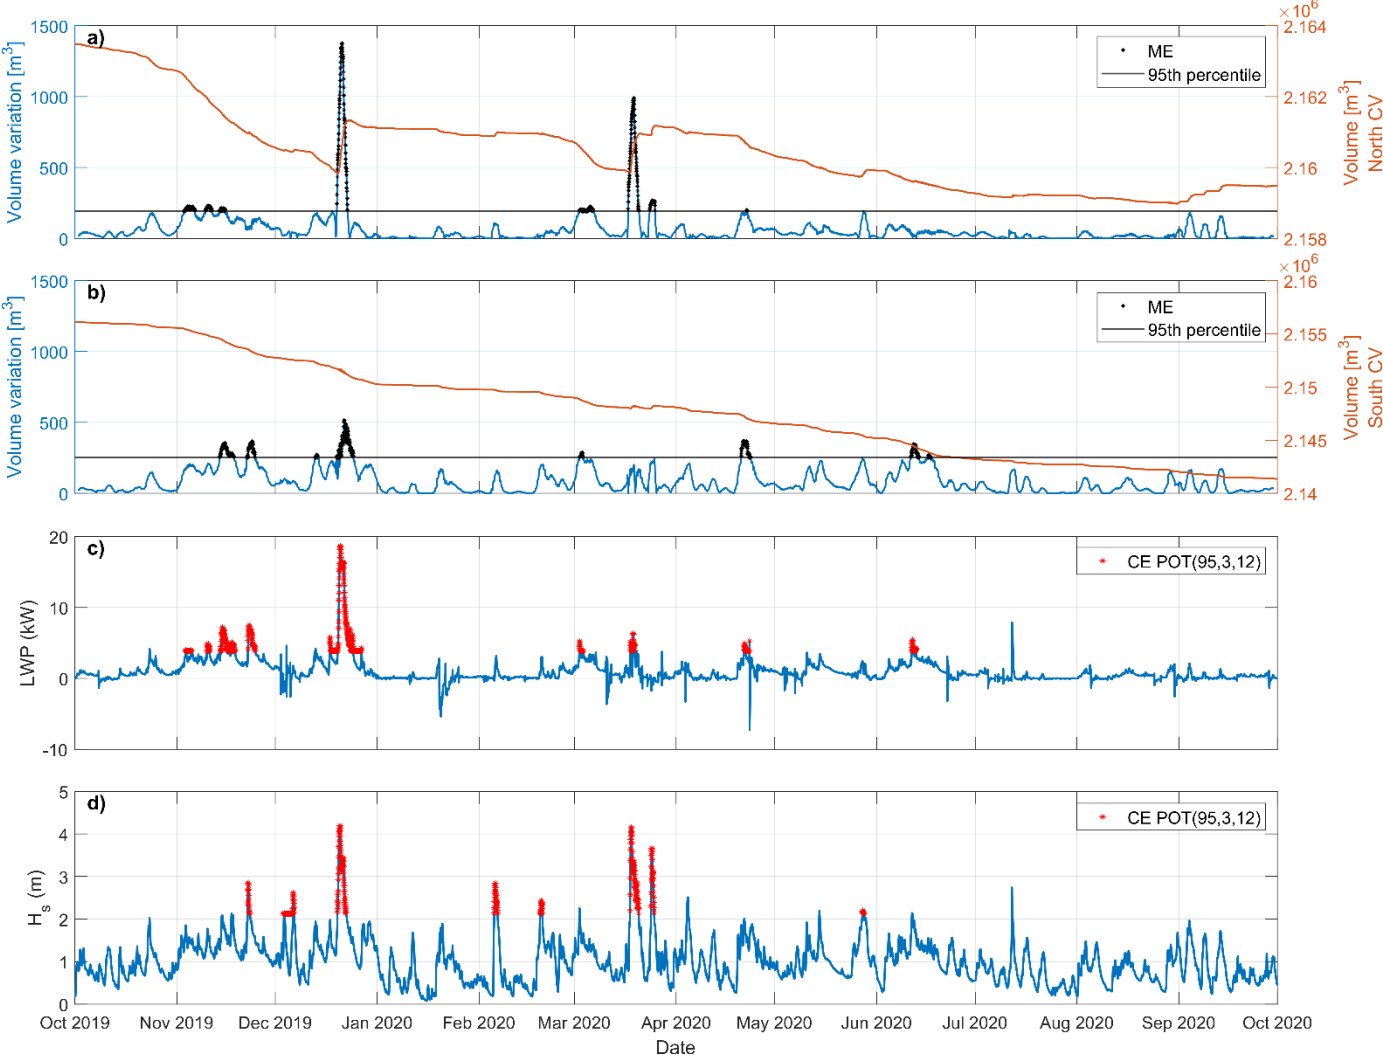

Figure S11. (a) Punta Umbría (study area) location in the Iberian Peninsula. (b) Control volume for the Punta Umbría Inlet shown on the actual bathymetry of the area. Bathymetric contours are represented every 1m, from 0 to -12 m MSL.

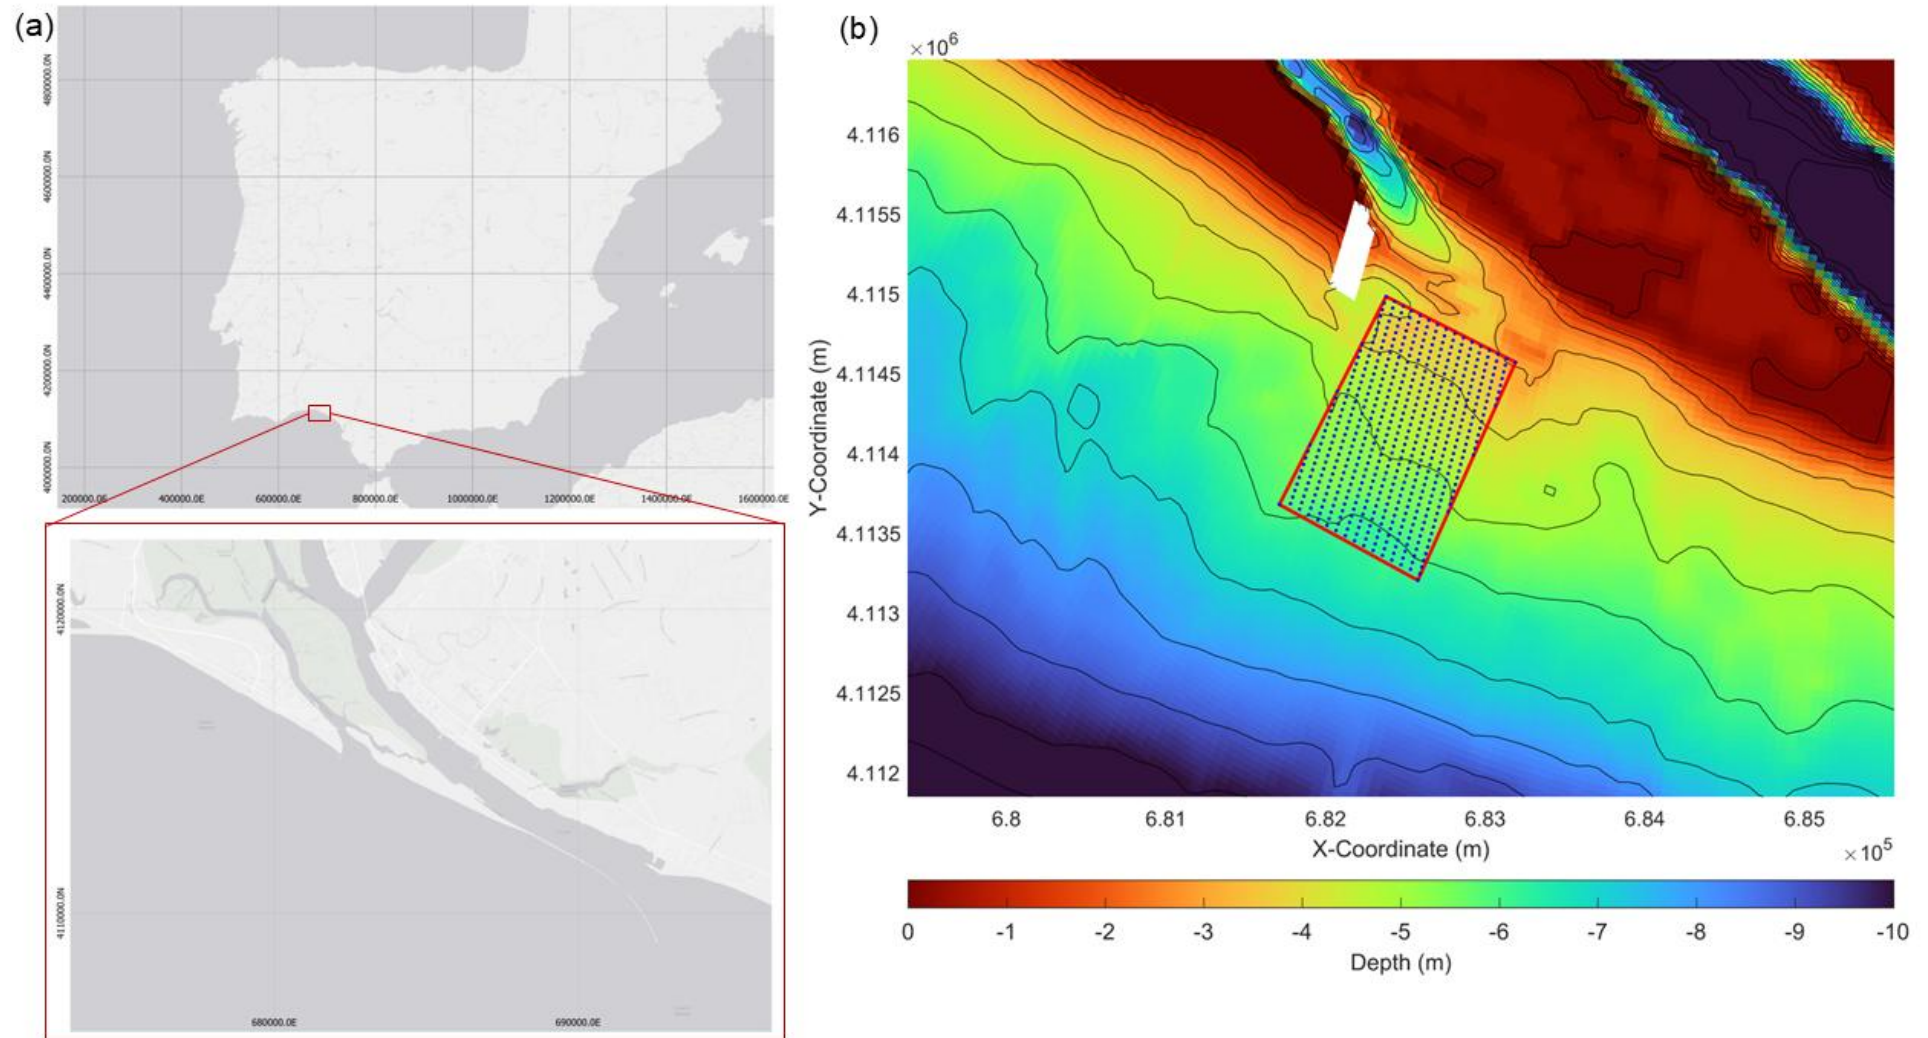

Figure S12. (a) Guadiana Estuary (study area) location in the Iberian Peninsula. (b) Control volume for the Guadiana Estuary shown on the actual bathymetry of the area. Bathymetric contours are represented every 1 m, from 0 to -12 m MSL.

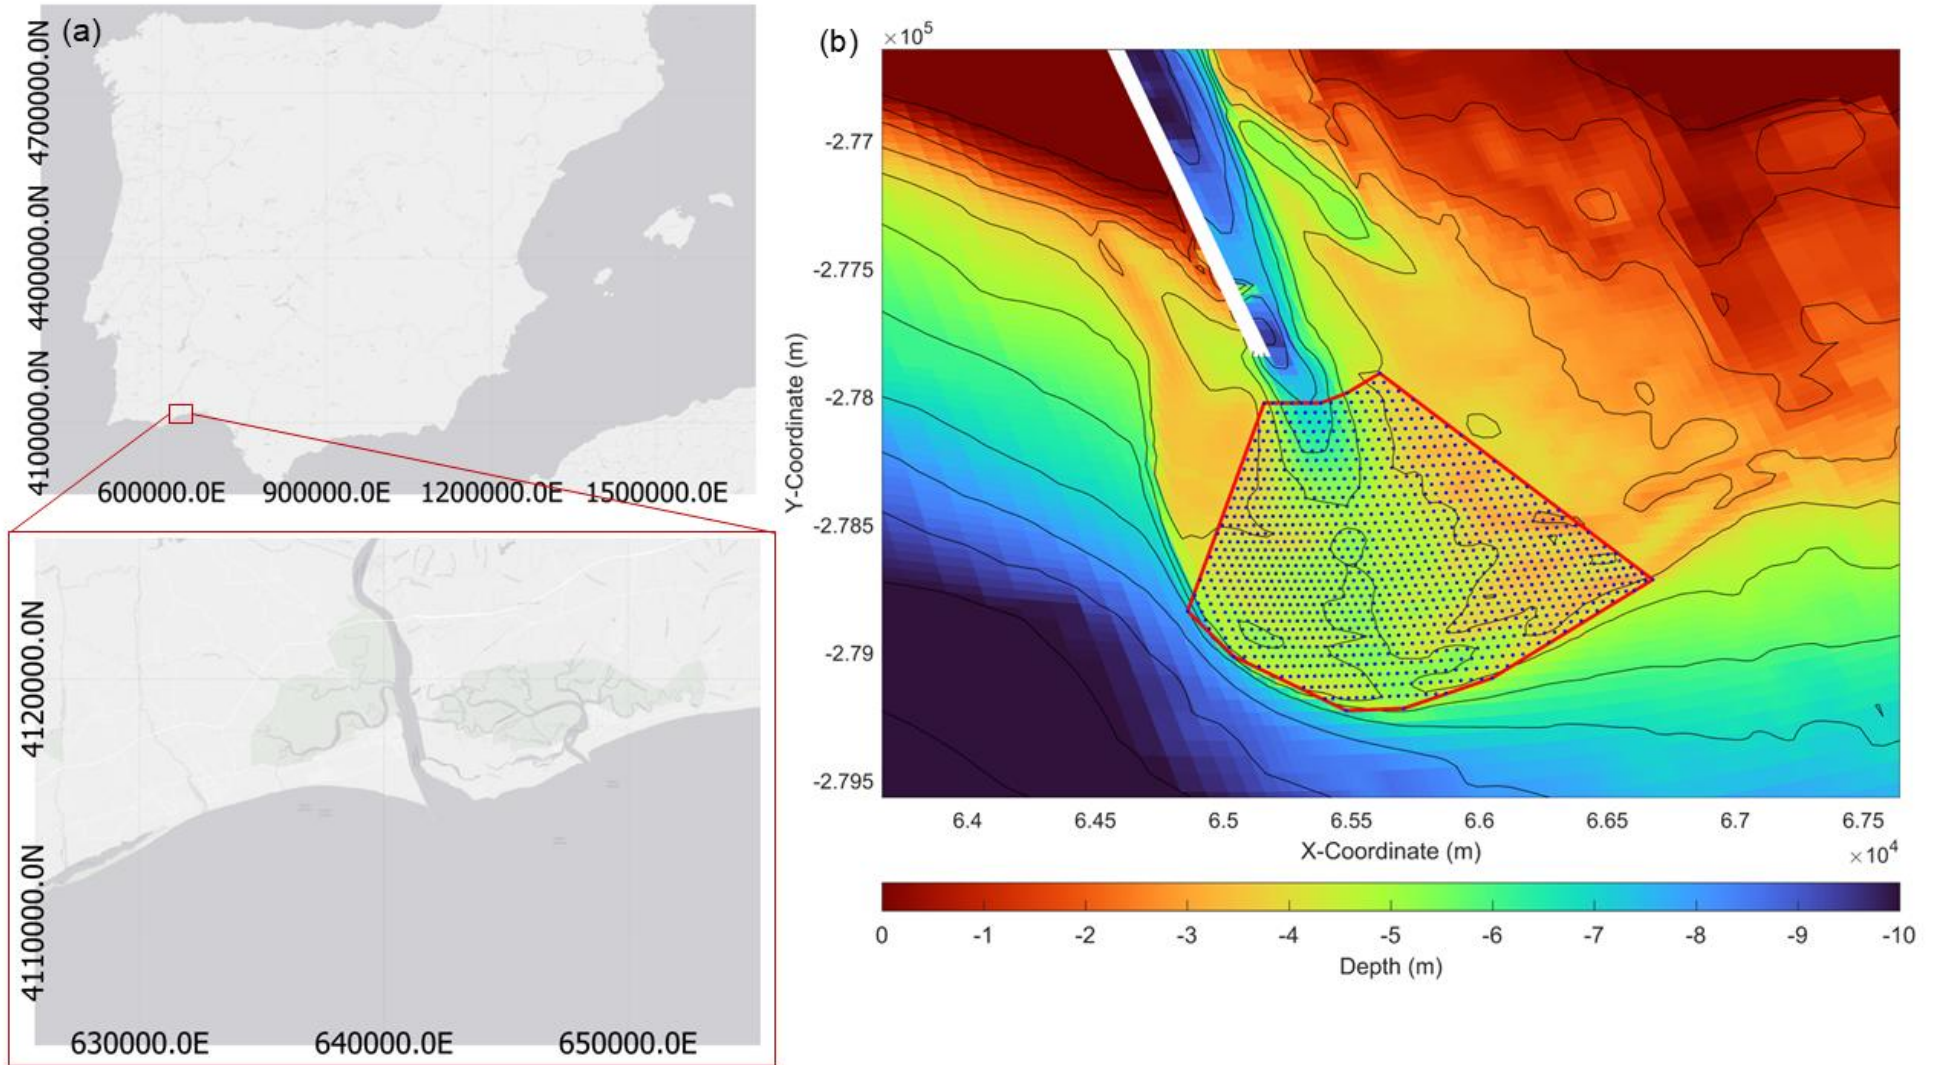

Supplement: Supplementary file 1 [file nhess-26-2065-2026-supplement.pdf]
